# Supplementary material for: Flow Cytometry Pulse Width Data Enables Rapid and Sensitive Estimation of Biomass Dry Weight in the Microalgae Chlamydomonas reinhardtii and Chlorella vulgaris
Source: PubMed Central journal article supplement (PMC4022489; doi:10.1371/journal.pone.0097269), 2014-05-15
Supplement: pone.0097269.s001.pdf [file pone.0097269.s001.pdf]

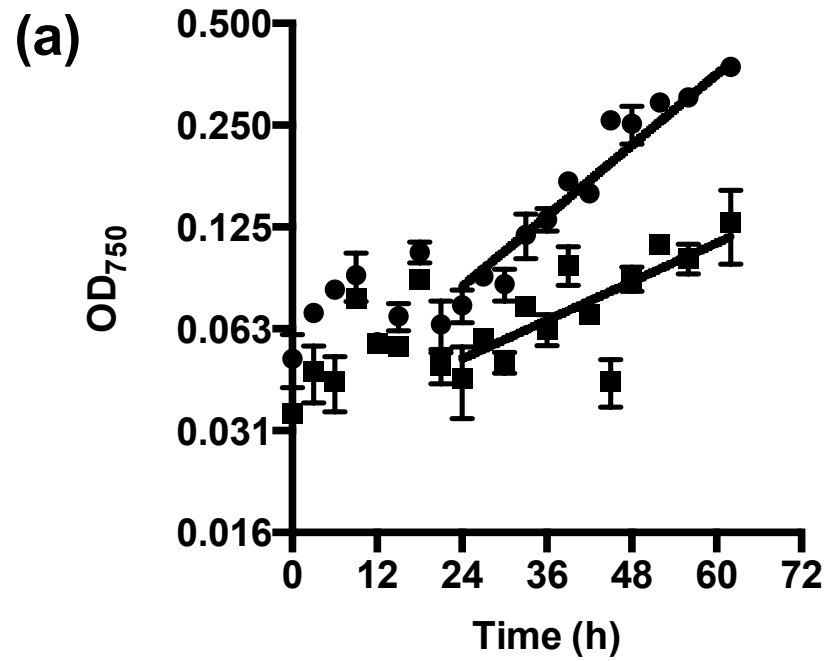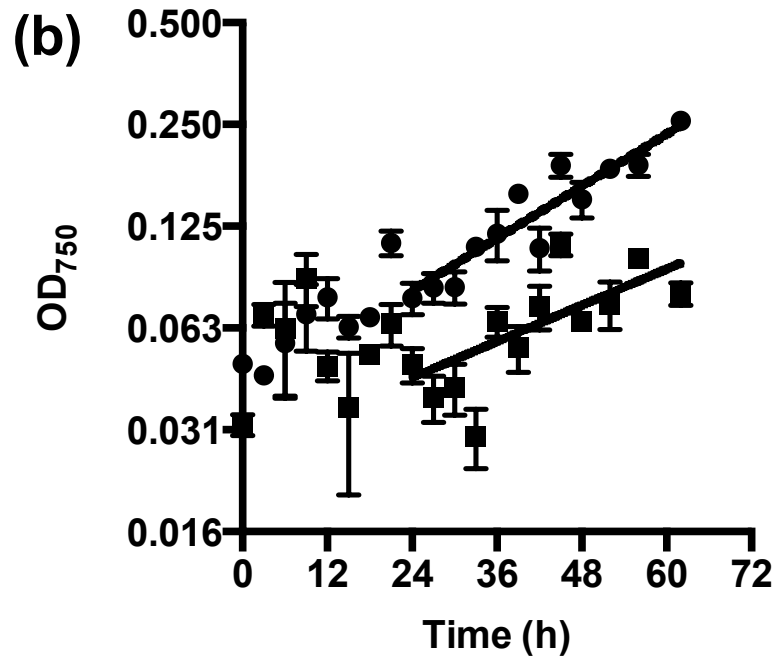

**Supplementary Figure S1:** Log<sub>2</sub> transformed growth curves from optical density at 750nm. Data is the same as in Figure 2. Growth curves monitored in 96 well plates by OD<sub>750</sub> in a plate reader (effective path length ~0.2cm) at different initial cell densities. (a) *Chlamydomonas reinhardtii* in TAP at initial cell density of 10<sup>6</sup> cells/mL (○) and at initial cell density of 2.5x10<sup>5</sup> cells/mL (●). (b) *Chlorella vulgaris* in TAP at initial cell density of 10<sup>6</sup> cells/mL (□) and at initial cell density of 2.5x10<sup>5</sup> cells/mL (■). Error bars are SEM (n=3). Slopes of the fitted lines were used to derive specific growth constants. Slopes were measured from 24h onwards to avoid the lag phase period.
