# Supplementary material for: Flow Cytometry Pulse Width Data Enables Rapid and Sensitive Estimation of Biomass Dry Weight in the Microalgae Chlamydomonas reinhardtii and Chlorella vulgaris
Source: PubMed Central journal article supplement (PMC4022489; doi:10.1371/journal.pone.0097269), 2014-05-15
Supplement: pone.0097269.s002.pdf [file pone.0097269.s002.pdf]

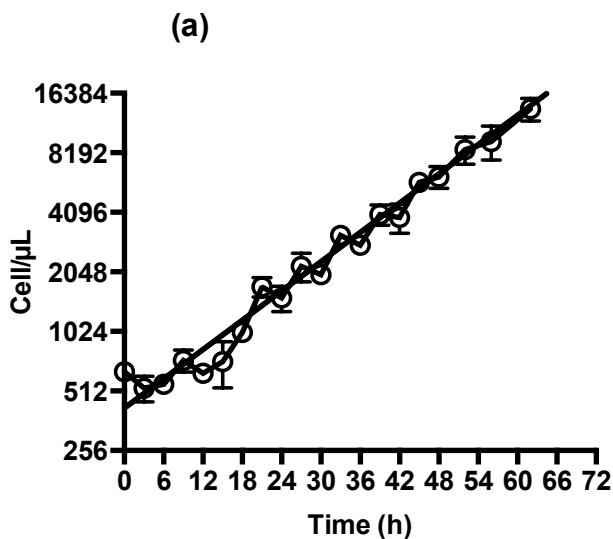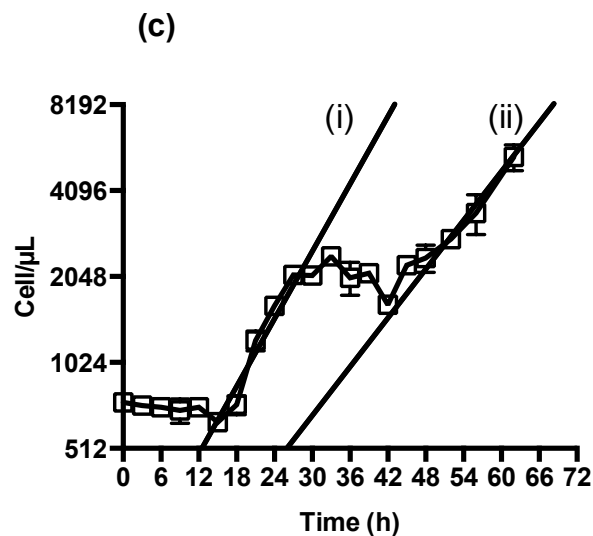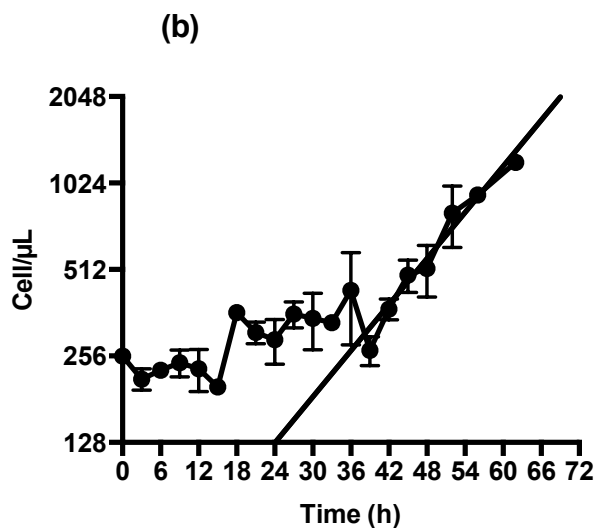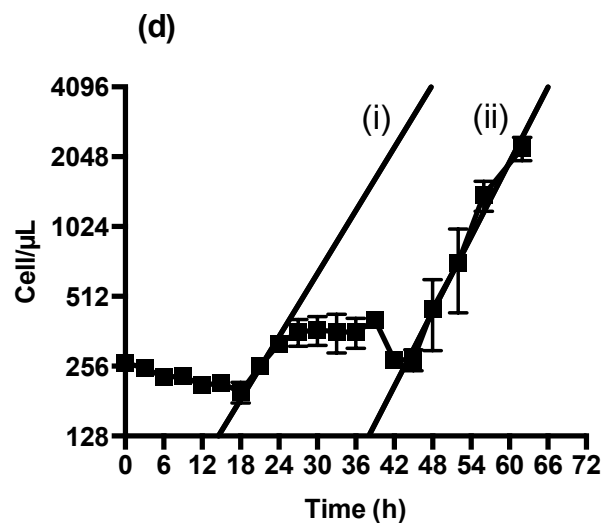

**Supplementary Figure S2:**  $\text{Log}_2$  transformed growth curves from flow cytometry. Data is the same as in Figure 3. Cell density (cells/μL) was estimated from flow cytometry events, calibrated using CountBright™ Absolute Counting Beads (Invitrogen™). Error bars are SEM (n=3). (a) *Chlamydomonas reinhardtii* strain 137c at initial cell density of  $10^6$  cells/mL (○). (b) *C. reinhardtii* strain 137c at initial cell density of  $2.5 \times 10^5$  cells/mL (●). (c) *Chlorella vulgaris* at initial cell density of  $10^6$  cells/mL (□). (d) *C. vulgaris* at initial cell density of  $2.5 \times 10^5$  cells/mL (■). Slopes of the fitted lines were used to derive specific growth constants. In the case of *C. vulgaris*, slopes were measured during both the first (i) and second (ii) rounds of cell division.
